# Supplementary material for: Distinct clinical and immunological features of SARS–CoV-2–induced multisystem inflammatory syndrome in children
Source: JCI journal article supplement (doi:10.1172/jci141113), 2020-07-23
Supplement: sd2 [file 2]

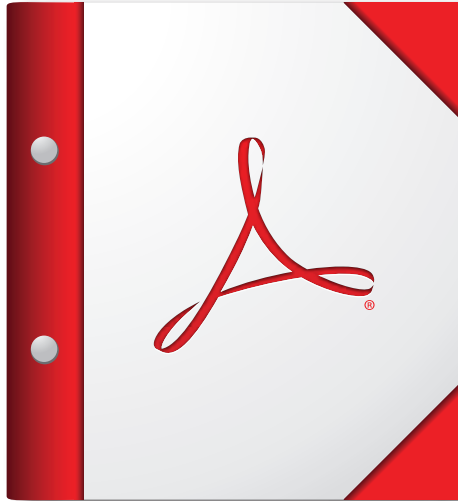

**For the best experience, open this PDF portfolio in  
Acrobat X or Adobe Reader X, or later.**

**Get Adobe Reader Now!**
